# Supplementary material for: Evaluation of Algorithm Performance in ChIP-Seq Peak Detection
Source: PubMed Central journal article supplement (PMC2900203; doi:10.1371/journal.pone.0011471), 2010-07-08

**CisGenome**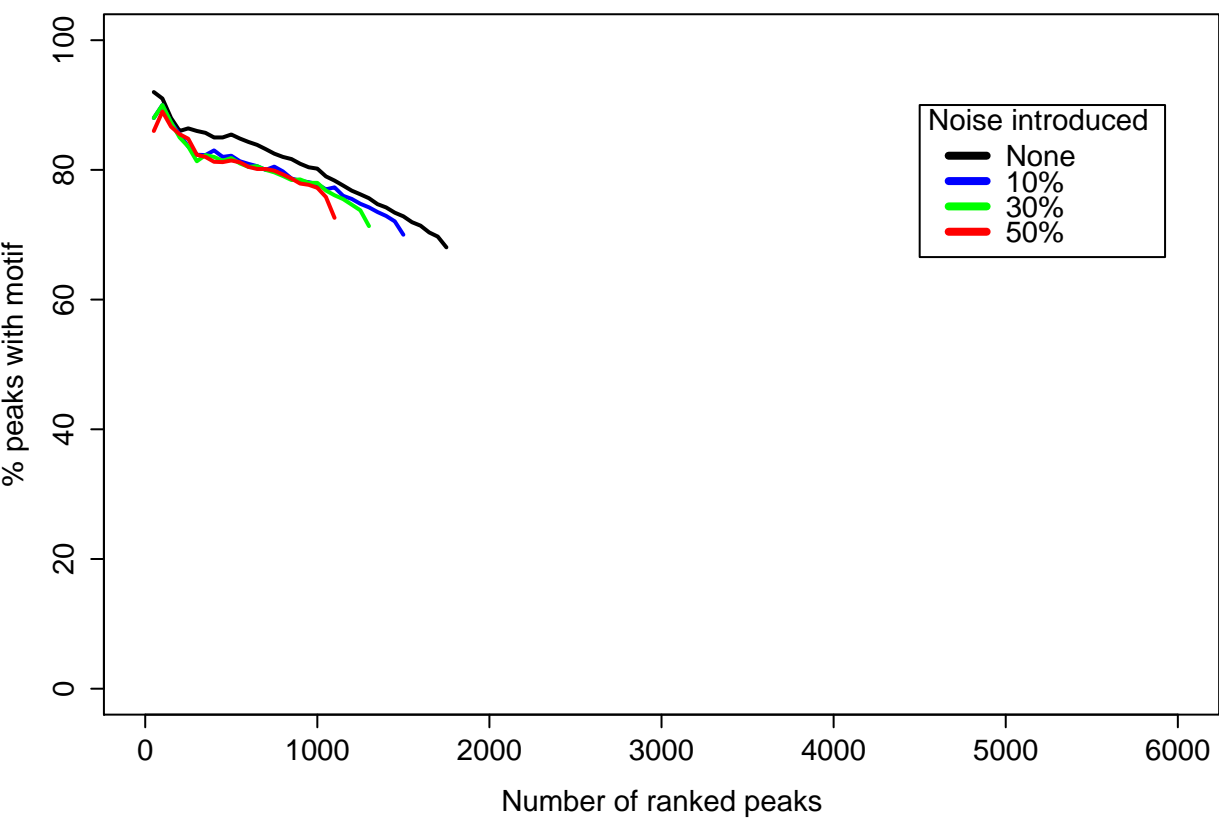**ERANGE**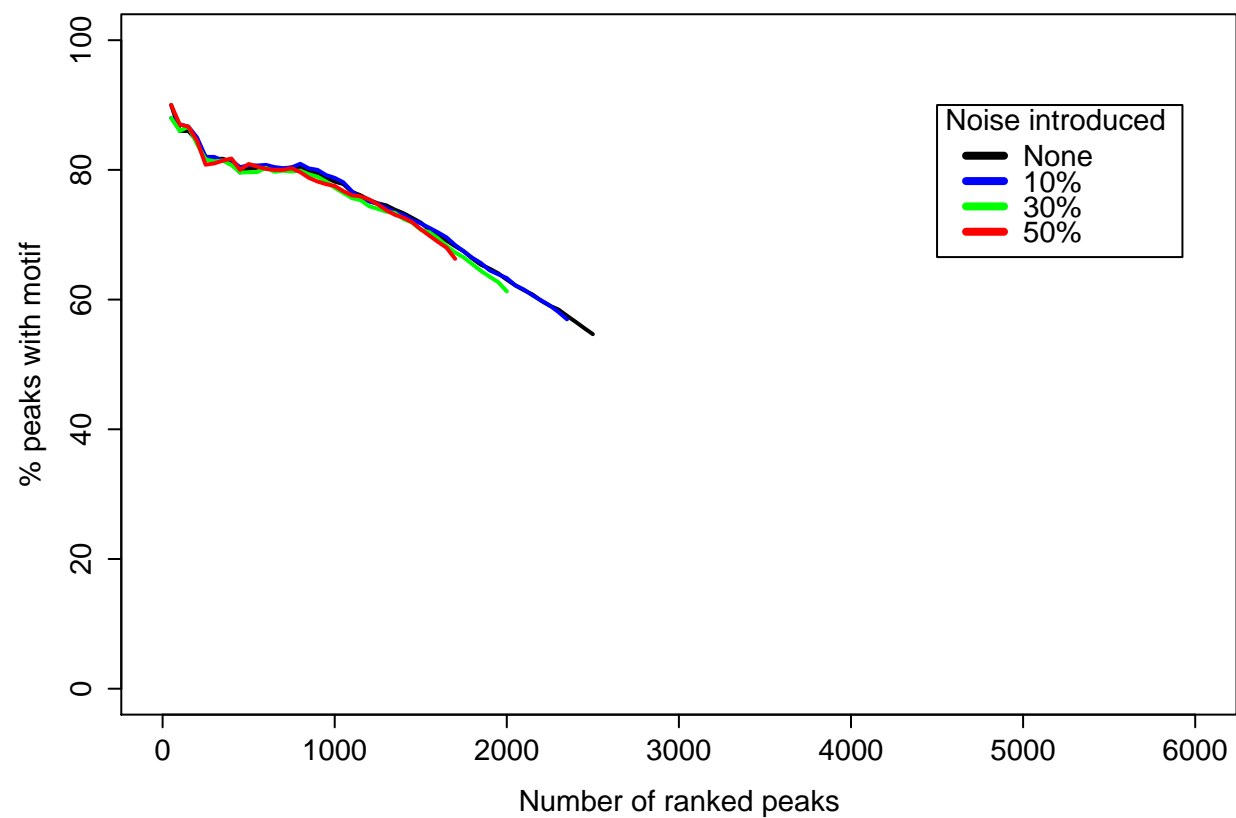**HPeak**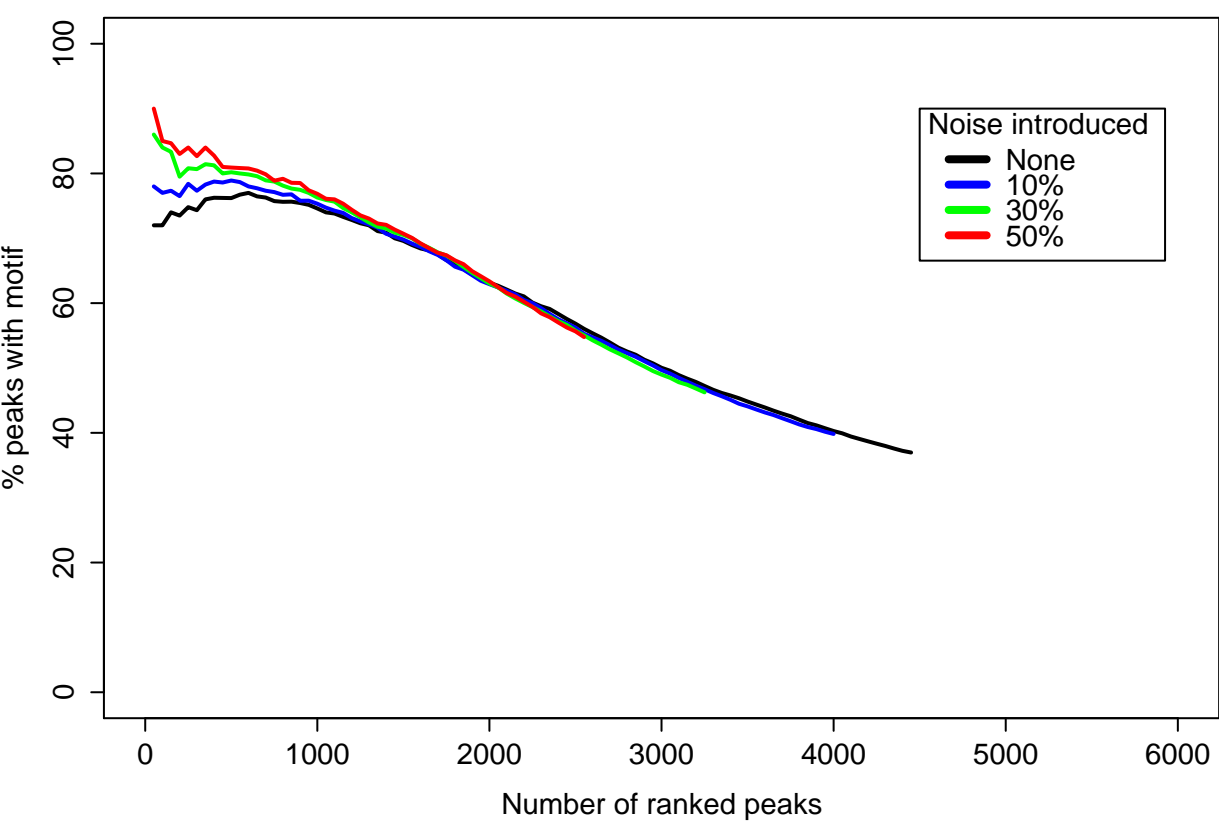**mtc**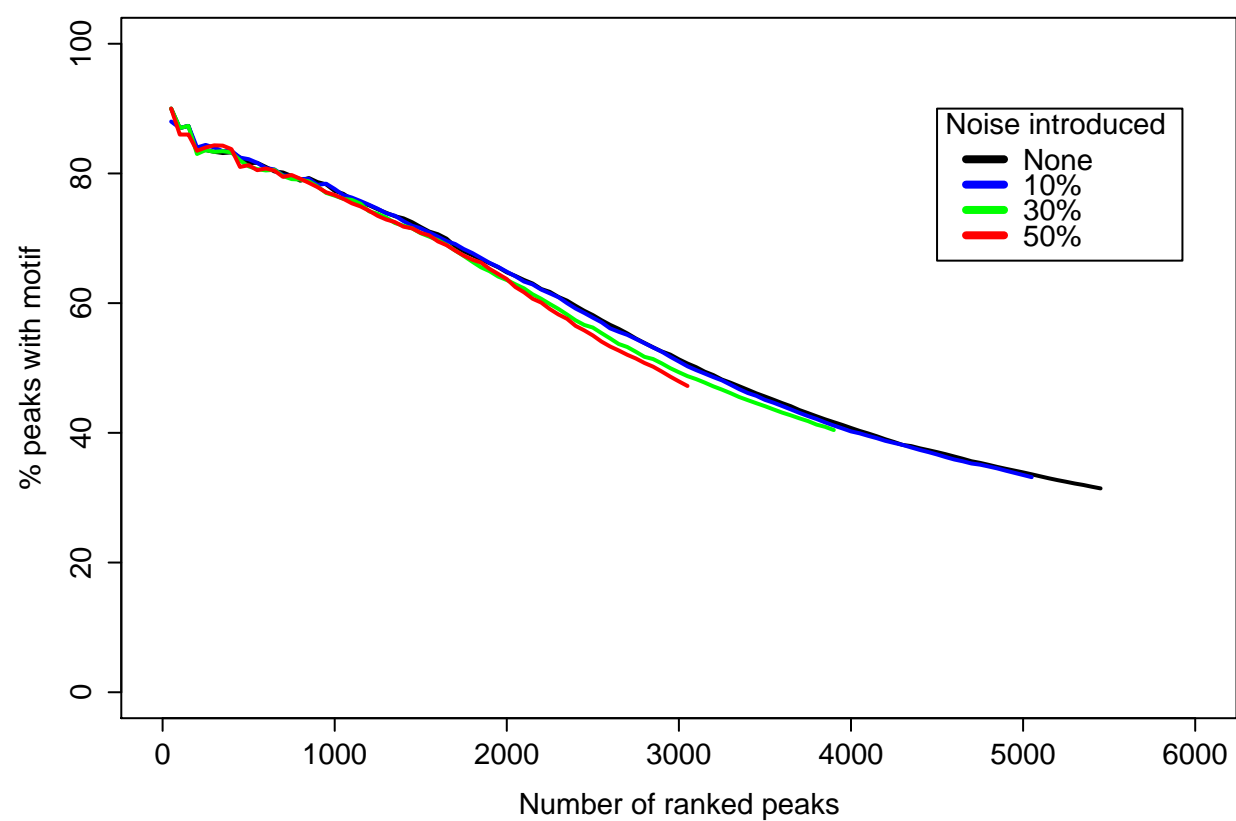**PeakSeq**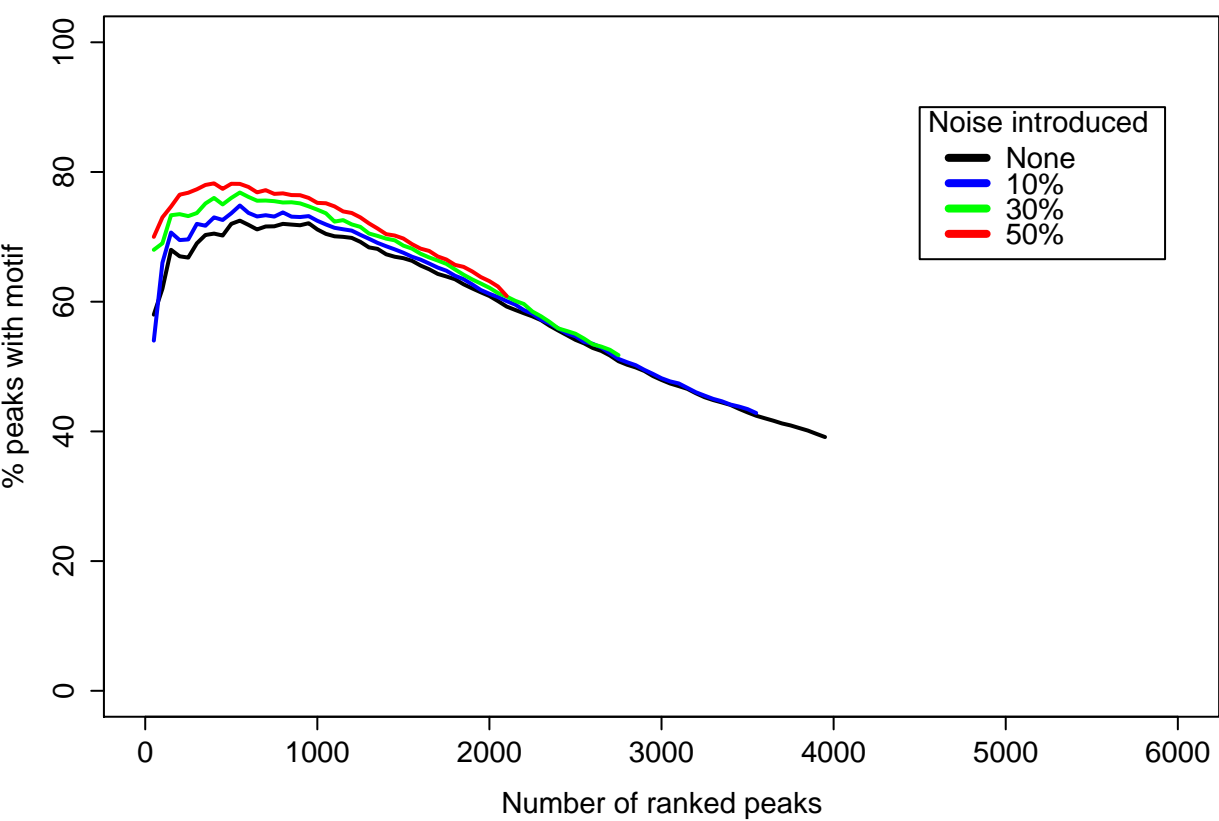**QuEST**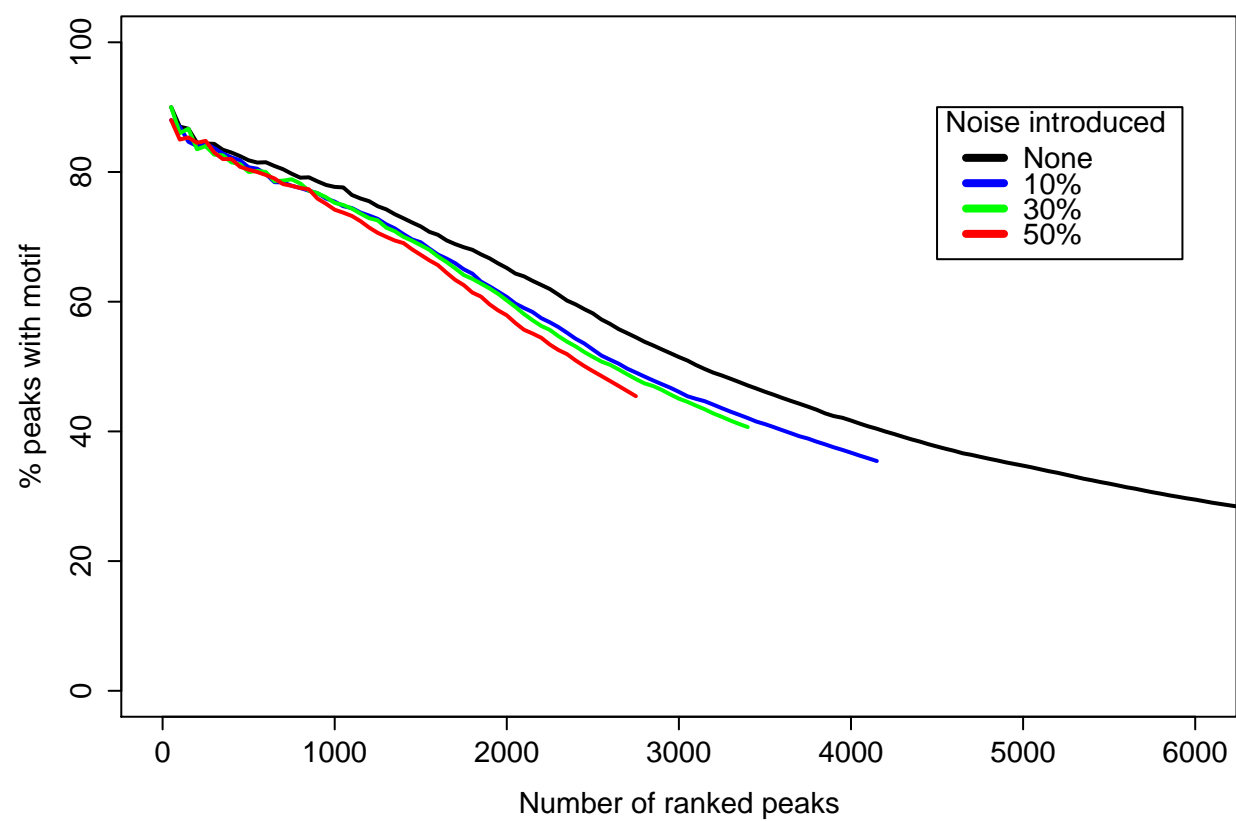

**SISSRS**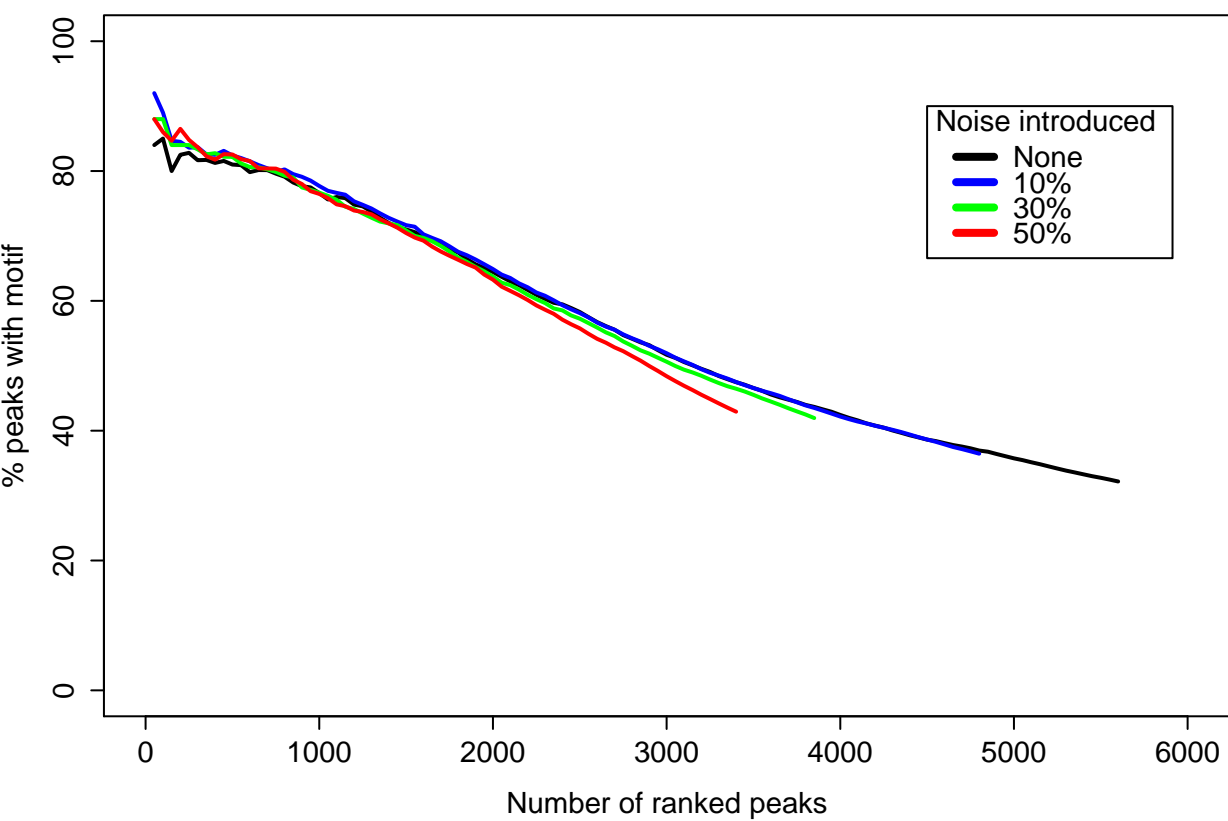**Sole-Search**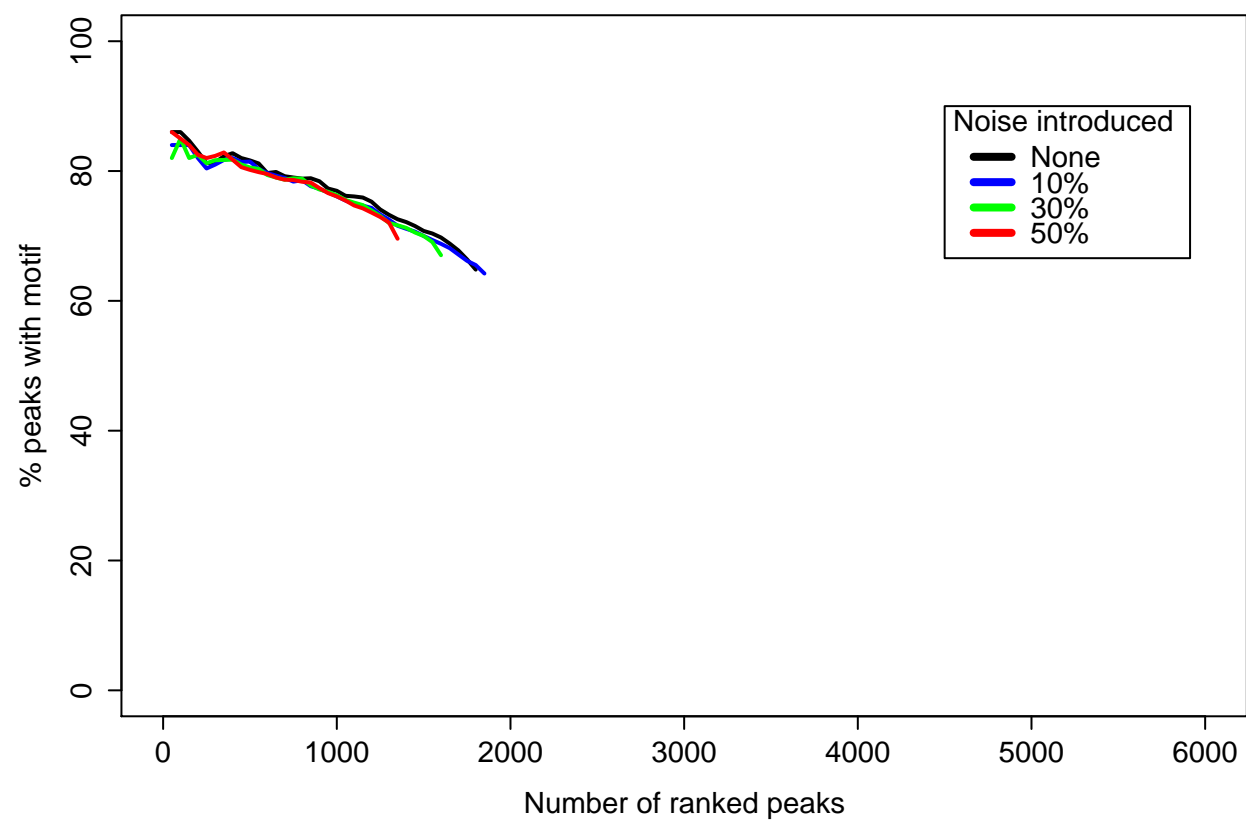**MCPF**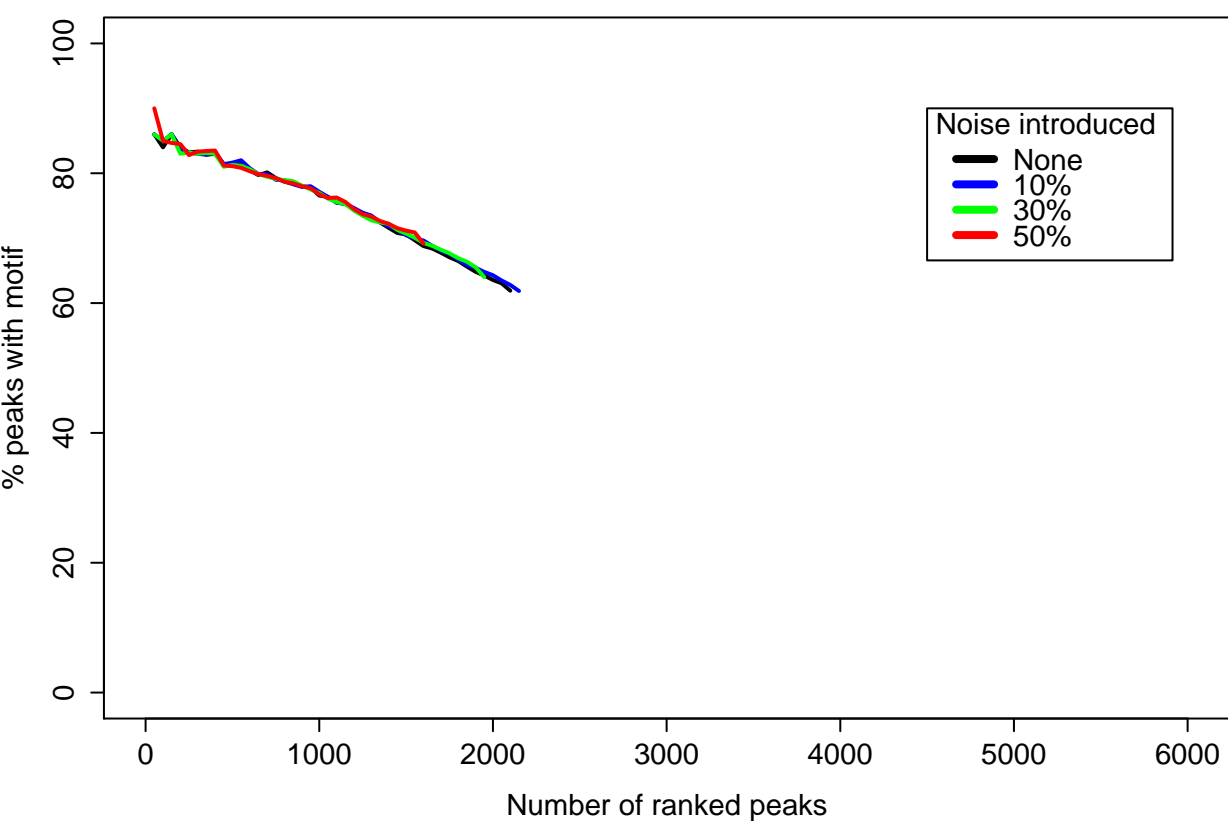**wtd**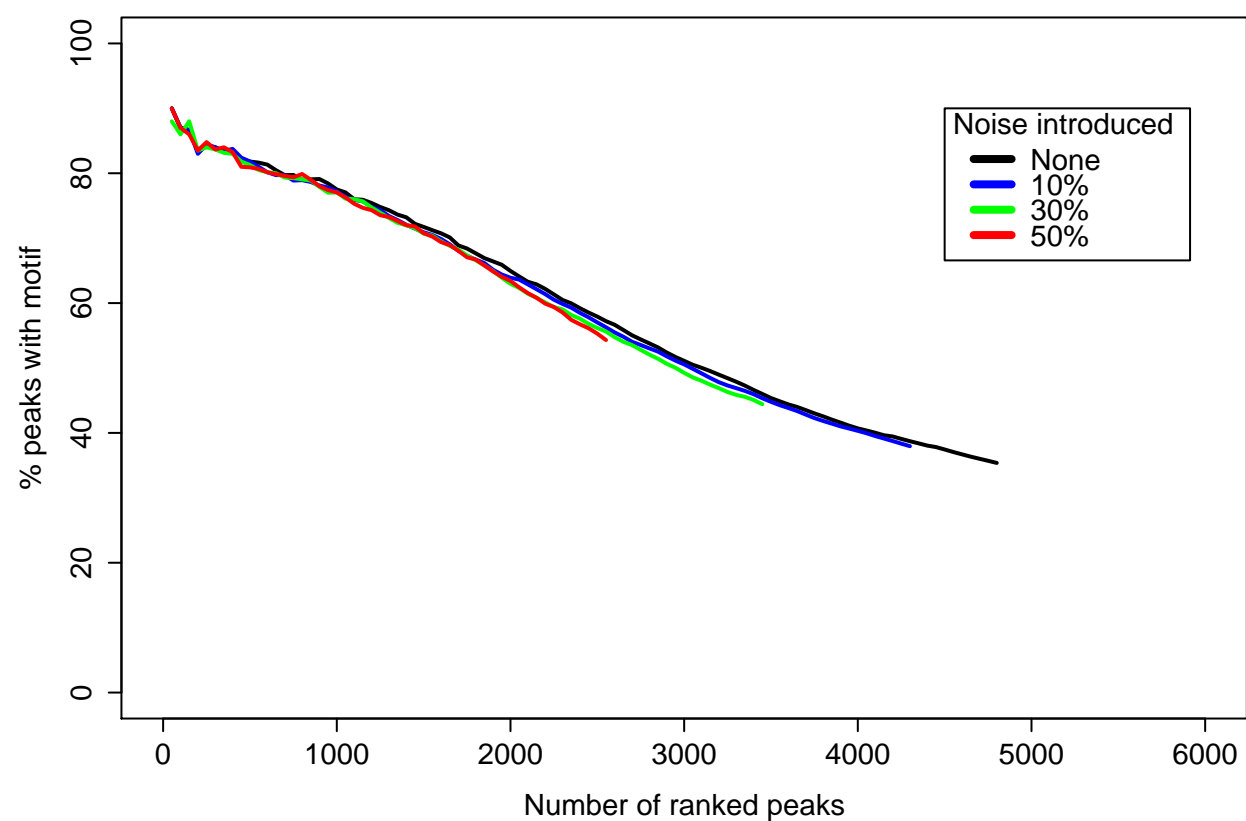**MACS**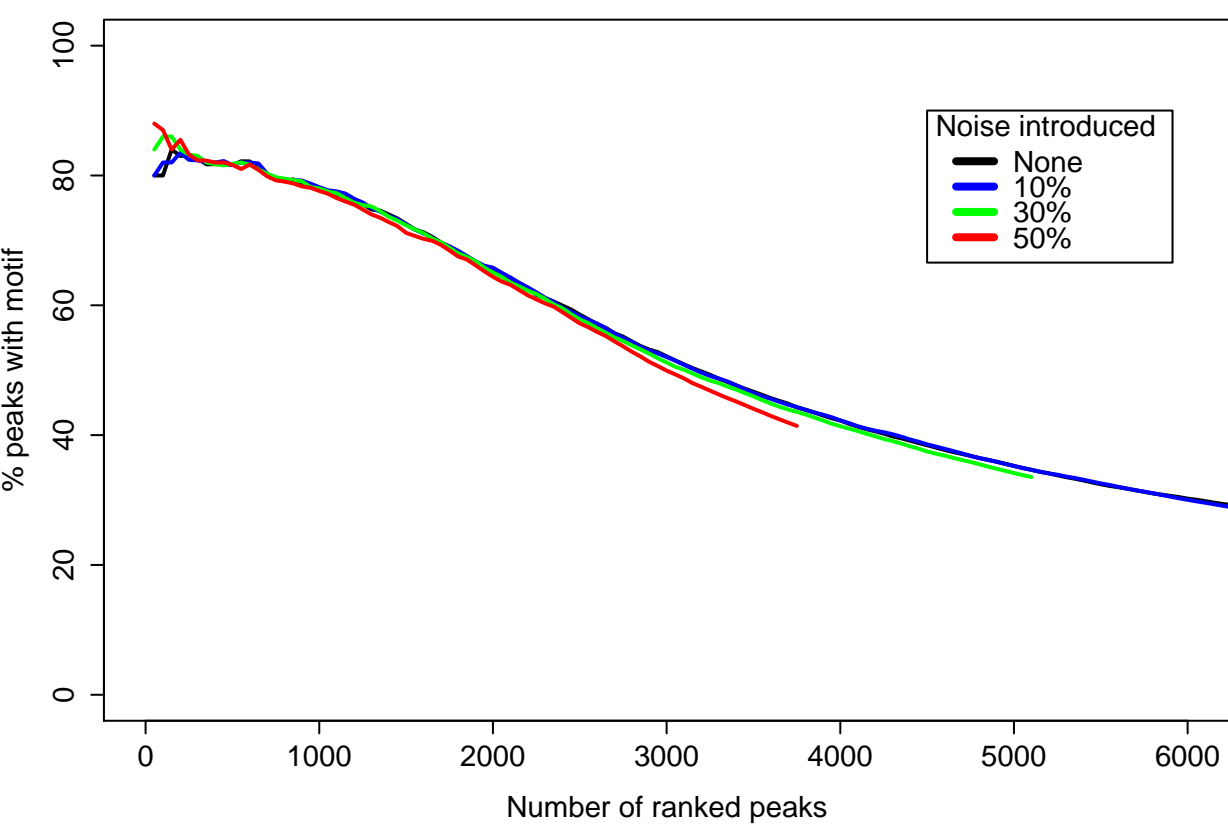

Supplement: pone.0011471.s011.pdf [file pone.0011471.s011.pdf]
